# Supplementary material for: Conserved conformational dynamics determine enzyme activity
Source: PubMed Central journal article supplement — Sci Adv. 2022 Aug 3;8(31):eabo5546. doi: 10.1126/sciadv.abo5546 (PMC9348788; doi:10.1126/sciadv.abo5546), 2022-08-03
Supplement: sciadv.abo5546_sm.pdf [file sciadv.abo5546_sm.pdf]

Supplementary Materials for  
**Conserved conformational dynamics determine enzyme activity**

Kristiane R. Torgeson *et al.*

Corresponding author: Wolfgang Peti, [peti@uchc.edu](mailto:peti@uchc.edu)

*Sci. Adv.* **8**, eabo5546 (2022)  
DOI: 10.1126/sciadv.abo5546

**This PDF file includes:**

Tables S1 to S4  
Figs. S1 to S11

**Table S1:** Enzymatic activity (Michaelis-Menten analysis) and protein stability ( $T_M$ )

| Variant                            | $k_{cat}$ ( $s^{-1}$ ) | f   | $K_M$ ( $\mu M$ ) | f   | $k_{cat} / K_M$<br>( $s^{-1}\mu M^{-1}$ ) | f   | $R^2$ | N  | $\Delta T_m$ ( $^{\circ}C$ ) |
|------------------------------------|------------------------|-----|-------------------|-----|-------------------------------------------|-----|-------|----|------------------------------|
| PTP1B                              | $11.4 \pm 0.9$         | --  | $496.1 \pm 26.2$  | --  | $23.1 \pm 3.7$                            | --  | 0.990 | 13 | (57.7)                       |
| PTP1B <sub>F225I</sub>             | $6.8 \pm 0.3$          | 0.6 | $688.3 \pm 38.3$  | 1.4 | $9.9 \pm 0.7$                             | 0.4 | 0.958 | 3  | -11.6                        |
| PTP1B <sub>F225L</sub>             | $7.6 \pm 0.3$          | 0.7 | $660.0 \pm 44.5$  | 1.4 | $11.5 \pm 0.9$                            | 0.5 | 0.962 | 3  | -7.9                         |
| PTP1B <sub>F225Y</sub>             | $20.3 \pm 0.9$         | 1.8 | $600.8 \pm 36.2$  | 1.2 | $33.7 \pm 2.5$                            | 1.5 | 0.974 | 4  | -7.7                         |
| PTP1B <sub>R199N</sub>             | $11.0 \pm 0.5$         | 1.0 | $530.7 \pm 30.9$  | 1.6 | $20.7 \pm 1.6$                            | 0.9 | 0.985 | 3  | -6.0                         |
| PTP1B <sub>FYRN</sub>              | $25.1 \pm 1.1$         | 2.2 | $655.0 \pm 30.7$  | 1.3 | $38.3 \pm 2.4$                            | 1.7 | 0.985 | 3  | -10.0                        |
| PTP1B <sub>RNLR</sub>              | $36.2 \pm 1.7$         | 3.2 | $868.8 \pm 27.5$  | 1.8 | $41.6 \pm 2.3$                            | 1.8 | 0.995 | 4  | -8.5                         |
| PTP1B <sub>FYRNLR</sub>            | $45.0 \pm 1.9$         | 3.9 | $598.0 \pm 25.7$  | 1.2 | $75.3 \pm 4.6$                            | 3.3 | 0.984 | 3  | -10.6                        |
| PTP1B <sub>L204A</sub>             | $23.6 \pm 1.0$         | 2.1 | $505.7 \pm 20.4$  | 1.1 | $46.7 \pm 2.7$                            | 2   | 0.990 | 4  | -5.5                         |
| PTP1B <sub>P206G</sub>             | $12.0 \pm 0.6$         | 1.1 | $551.1 \pm 41.4$  | 1.1 | $21.7 \pm 1.9$                            | 0.9 | 0.952 | 3  | -2.8                         |
| PTP1B <sub>GGGGG</sub>             | $21.6 \pm 1.0$         | 1.9 | $839.8 \pm 26.1$  | 1.7 | $25.7 \pm 1.4$                            | 1.1 | 0.995 | 3  | -11.6                        |
| PTP1B $\Delta$ 7                   | $8.6 \pm 0.2$          | --  | $900.6 \pm 30.0$  | --  | $9.6 \pm 0.4$                             | --  | 0.989 | 4  | (54.9)                       |
| PTP1B $\Delta$ 7 <sub>F225Y</sub>  | $16.1 \pm 0.5$         | 1.9 | $987.9 \pm 25.0$  | 1.1 | $16.3 \pm 0.6$                            | 1.7 | 0.994 | 4  | -6.8                         |
| PTP1B $\Delta$ 7 <sub>FYRN</sub>   | $18.0 \pm 0.2$         | 2.1 | $1054.4 \pm 42.2$ | 1.2 | $17.0 \pm 0.7$                            | 1.8 | 0.987 | 4  | -8.3                         |
| PTP1B $\Delta$ 7 <sub>FYRNLR</sub> | $40.60 \pm 1.0$        | 4.7 | $843.9 \pm 25.1$  | 0.9 | $48.1 \pm 1.8$                            | 5.0 | 0.992 | 4  | -9.3                         |

**Table S2:** Data Collection and Statistics of PTP1B Variant Crystal Structures

|                                | PTP1B<br>F225Y                   | PTP1B<br>F225Y +<br>TCS401       | PTP1BΔ7<br>FYRN                  | PTP1BΔ7<br>FYRN +<br>TCS401      | PTP1BΔ7<br>FYRNLR                | PTP1B<br>FYRNLR +<br>TCS401     | PTP1B<br>L204A                   | PTP1B<br>L204A +<br>TCS401       |
|--------------------------------|----------------------------------|----------------------------------|----------------------------------|----------------------------------|----------------------------------|---------------------------------|----------------------------------|----------------------------------|
| PDB                            | 7MKZ                             | 7MN7                             | 7MN9                             | 7MNA                             | 7MOU                             | 7MNB                            | 7MNC                             | 7MND                             |
| Data Collection                |                                  |                                  |                                  |                                  |                                  |                                 |                                  |                                  |
| Beamline                       | SSRL 12-2                        | SSRL 12-2                       | SSRL 12-2                        | SSRL 12-2                        |
| Space group                    | P 3 <sub>2</sub> 2 1             | P 3 <sub>1</sub> 2 1             | P 3 <sub>2</sub> 2 1             | P 3 <sub>2</sub> 2 1             | P 3 <sub>2</sub> 2 1             | P 3 <sub>1</sub> 2 1            | P 3 <sub>2</sub> 2 1             | P 3 <sub>1</sub> 2 1             |
| Unit cell                      | 88.6 88.6<br>72.6 90 90<br>120   | 88.5 88.5<br>104.2 90<br>90 120  | 88.5 88.5<br>72.4 90 90<br>120   | 88.0 88.0<br>72.3 90 90<br>120   | 88.4 88.4<br>72.5 90 90<br>120   | 88.8 88.8<br>106.0 90<br>90 120 | 87.6 87.6<br>71.1 90 90<br>120   | 88.3 88.3<br>105.0 90<br>90 120  |
| Resolution (Å)                 | 37.81 -<br>1.40 (1.42<br>- 1.40) | 38.33 -<br>1.95 (2.00<br>- 1.95) | 38.31 -<br>1.24 (1.26<br>- 1.24) | 38.11 -<br>1.47 (1.49<br>- 1.47) | 38.29 -<br>1.48 (1.50<br>- 1.48) | 38.46 -<br>2.2 (2.27 -<br>2.2)  | 37.97 -<br>1.85 (1.89<br>- 1.85) | 21.64 -<br>2.29 (2.37<br>- 2.29) |
| Multiplicity                   | 10.0 (9.4)                       | 11.3 (10.9)                      | 8.1 (7.0)                        | 3.7 (3.4)                        | 11.1 (10.2)                      | 11.1 (11.0)                     | 11.2 (10.2)                      | 6.5 (1.7)                        |
| Completeness (%)               | 99.6 (96.0)                      | 99.7 (98.8)                      | 99.5 (92.1)                      | 98.9 (96.0)                      | 99.8 (98.1)                      | 98.5 (98.8)                     | 97.6 (85.8)                      | 99.3 (98.7)                      |
| I/sigma(I)                     | 14.6 (1.5)                       | 15.5 (1.9)                       | 15.9 (1.6)                       | 14.7 (2.42)                      | 19.2 (2.2)                       | 13.0 (2.4)                      | 17.1 (4.8)                       | 12.8 (2.3)                       |
| R-merge                        | 0.076<br>(1.40)                  | 0.115<br>(1.305)                 | 0.056<br>(0.607)                 | 0.045<br>(0.525)                 | 0.073<br>(1.047)                 | 0.138<br>(1.032)                | 0.087<br>(0.605)                 | 0.0223<br>(0.341)                |
| CC1/2                          | 1.00 (0.67)                      | 1.00<br>(0.701)                  | 0.994<br>(0.999)                 | 0.998<br>(0.743)                 | 0.997<br>(0.772)                 | 0.910<br>(0.816)                | 0.998<br>(0.932)                 | 0.999<br>(0.814)                 |
| Refinement                     |                                  |                                  |                                  |                                  |                                  |                                 |                                  |                                  |
| Reflections used in refinement | 64808                            | 32918                            | 92153                            | 54665                            | 54765                            | 24596                           | 26590                            | 21743                            |
| Reflections used for R-free    | 3474                             | 1775                             | 4841                             | 2974                             | 2734                             | 1372                            | 1280                             | 1024                             |
| R-work/                        | 0.156                            | 0.156                            | 0.162                            | 0.170                            | 0.172                            | 0.164                           | 0.174                            | 0.166                            |
| R-free                         | 0.173                            | 0.190                            | 0.180                            | 0.194                            | 0.180                            | 0.199                           | 0.204                            | 0.203                            |
| No of atoms                    | 2629                             | 2792                             | 2722                             | 2503                             | 2619                             | 2664                            | 2331                             | 2579                             |
| protein                        | 2328                             | 2487                             | 2337                             | 2257                             | 2367                             | 2424                            | 2215                             | 2400                             |
| ligands                        | 22                               | 53                               | 28                               | 36                               | 23                               | 43                              | 13                               | 43                               |
| solvent                        | 279                              | 252                              | 357                              | 210                              | 229                              | 197                             | 103                              | 136                              |
| RMS deviations                 |                                  |                                  |                                  |                                  |                                  |                                 |                                  |                                  |
| Bond lengths (Å)               | 0.014                            | 0.016                            | 0.016                            | 0.014                            | 0.014                            | 0.003                           | 0.009                            | 0.008                            |
| Bond angles (°)                | 1.3                              | 1.29                             | 1.5                              | 1.34                             | 1.32                             | 0.56                            | 1.05                             | 1                                |
| Ramachandran                   |                                  |                                  |                                  |                                  |                                  |                                 |                                  |                                  |
| Favored (%)                    | 98.2                             | 97.0                             | 98.2                             | 98.2                             | 97.9                             | 97.6                            | 96.4                             | 97.3                             |
| Allowed (%)                    | 1.4                              | 2.7                              | 1.4                              | 1.4                              | 1.4                              | 2.0                             | 2.9                              | 2.4                              |
| Outliers (%)                   | 0.36                             | 0.34                             | 0.36                             | 0.36                             | 0.71                             | 0.34                            | 0.72                             | 0.34                             |
| Clashscore                     | 3.42                             | 3.18                             | 5.32                             | 3.11                             | 4                                | 3.28                            | 3.88                             | 2.07                             |
| B-factors                      |                                  |                                  |                                  |                                  |                                  |                                 |                                  |                                  |
| Average B-factor               | 26.2                             | 33.5                             | 25.6                             | 22.7                             | 22.4                             | 38.2                            | 32.7                             | 27.7                             |
| Macro-molecules                | 25.0                             | 32.32                            | 23.69                            | 22.24                            | 21.82                            | 37.74                           | 32.63                            | 27.57                            |
| ligands                        | 41.4                             | 41.67                            | 41.75                            | 21.7                             | 30.18                            | 43.62                           | 48.93                            | 32.26                            |
| solvent                        | 34.6                             | 43.11                            | 36.66                            | 27.4                             | 27.35                            | 43.12                           | 31.43                            | 28.4                             |

**Table S3:** PTP1B<sub>L204A</sub> residues: specific intermediate exchange group

| $k_{\text{ex}}$ (s <sup>-1</sup> ) | pB (%)    | Residues                                                                                                                                                                                                                                                                                                                                                                                                                                                                                                                    |
|------------------------------------|-----------|-----------------------------------------------------------------------------------------------------------------------------------------------------------------------------------------------------------------------------------------------------------------------------------------------------------------------------------------------------------------------------------------------------------------------------------------------------------------------------------------------------------------------------|
| 3000 ± 40                          | 3.4 ± 0.2 | I19, I23, V49(C $\gamma_2$ ), I57, I72, V107(C $\gamma_1$ ), L110(C $\delta_1$ ), V113(C $\gamma_1$ ), L119(C $\delta_1$ &C $\delta_2$ ), I134, I149, L163(C $\delta_1$ &C $\delta_2$ ), I171, V184(C $\gamma_1$ ), L195(C $\delta_1$ &C $\delta_2$ ), V212(C $\gamma_2$ ), V213(C $\gamma_1$ ), I219, L227(C $\delta_1$ &C $\delta_2$ ), L233(C $\delta_1$ &C $\delta_2$ ), I246, V249(C $\gamma_2$ ), L250(C $\delta_1$ ), L251(C $\delta_2$ ), L260(C $\delta_1$ ), I261, L267(C $\delta_1$ ), L272(C $\delta_1$ ), I275 |
| 5000 ± 210                         | 0.9 ± 0.1 | L140(C $\delta_1$ &C $\delta_2$ ), L142(C $\delta_1$ &C $\delta_2$ ), L144(C $\delta_1$ ), I281, L294(C $\delta_1$ )                                                                                                                                                                                                                                                                                                                                                                                                        |

**Table S4:** PTP1B<sub>L204A</sub> residues in complex with TCS401; specific intermediate exchange group

| $k_{ex}$ (s <sup>-1</sup> ) | pB (%)    | Residues                                                                                                                                                                                                                                                      |
|-----------------------------|-----------|---------------------------------------------------------------------------------------------------------------------------------------------------------------------------------------------------------------------------------------------------------------|
| 3130 ± 280                  | 0.3 ± 0.1 | I19, L140(C $\delta_1$ &C $\delta_2$ ), L142(C $\delta_1$ &C $\delta_2$ ), L144 (C $\delta_1$ &C $\delta_2$ ), L294(C $\delta_1$ )                                                                                                                            |
| 1340 ± 120                  | 1.9 ± 0.9 | L83(C $\delta_1$ ), L110(C $\delta_1$ ), V155(C $\gamma_1$ ), I171, L192(C $\delta_1$ ), L195(C $\delta_1$ ), V211(C $\gamma_1$ ), V213(C $\gamma_1$ ), L227(C $\delta_2$ ), V244(C $\gamma_1$ &C $\gamma_2$ ) L250(C $\delta_1$ ), L272(C $\delta_1$ ), I275 |
| 680 ± 40                    | 11 ± 1    | V49(C $\gamma_1$ ), V107(C $\gamma_1$ ), V113(C $\gamma_1$ ), L119(C $\delta_1$ ), V184(C $\gamma_1$ ), I261                                                                                                                                                  |

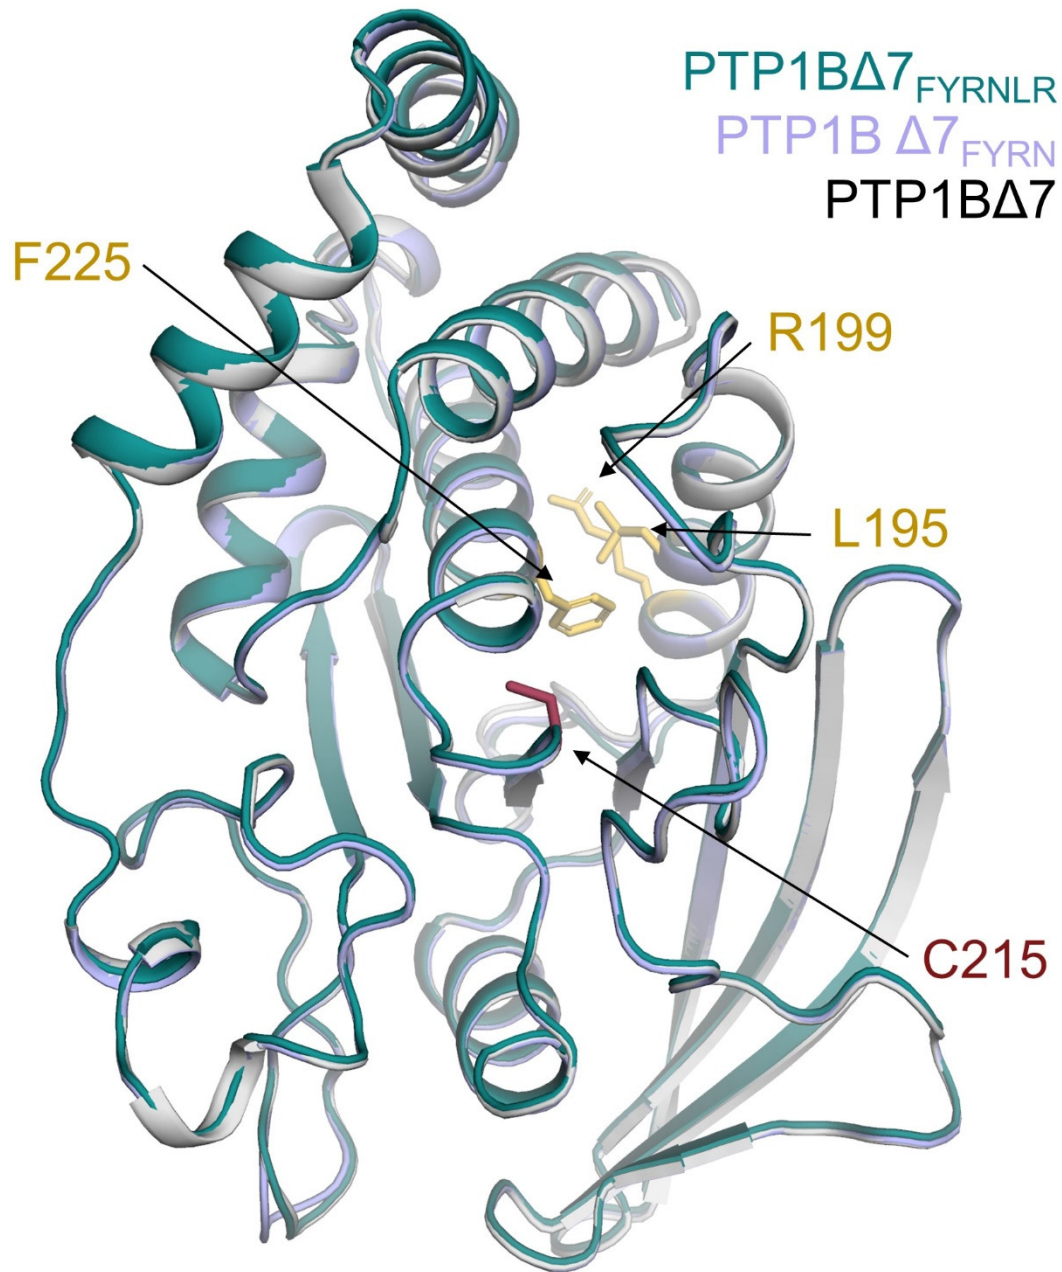

**Figure S1. Crystal structures of PTP1B $\Delta$ 7<sub>FYRN</sub> and PTP1B $\Delta$ 7<sub>FYRNLR</sub>.** Cartoon overlay of PTP1B $\Delta$ 7 (PDB 5KA0, grey) with PTP1B $\Delta$ 7<sub>FYRN</sub> (PDB 7MN9, light blue) and PTP1B $\Delta$ 7<sub>FYRNLR</sub> (PDB 7MOU, teal). Residues mutated in a subset of variants are shown as yellow sticks; catalytic cysteine shown as red stick.

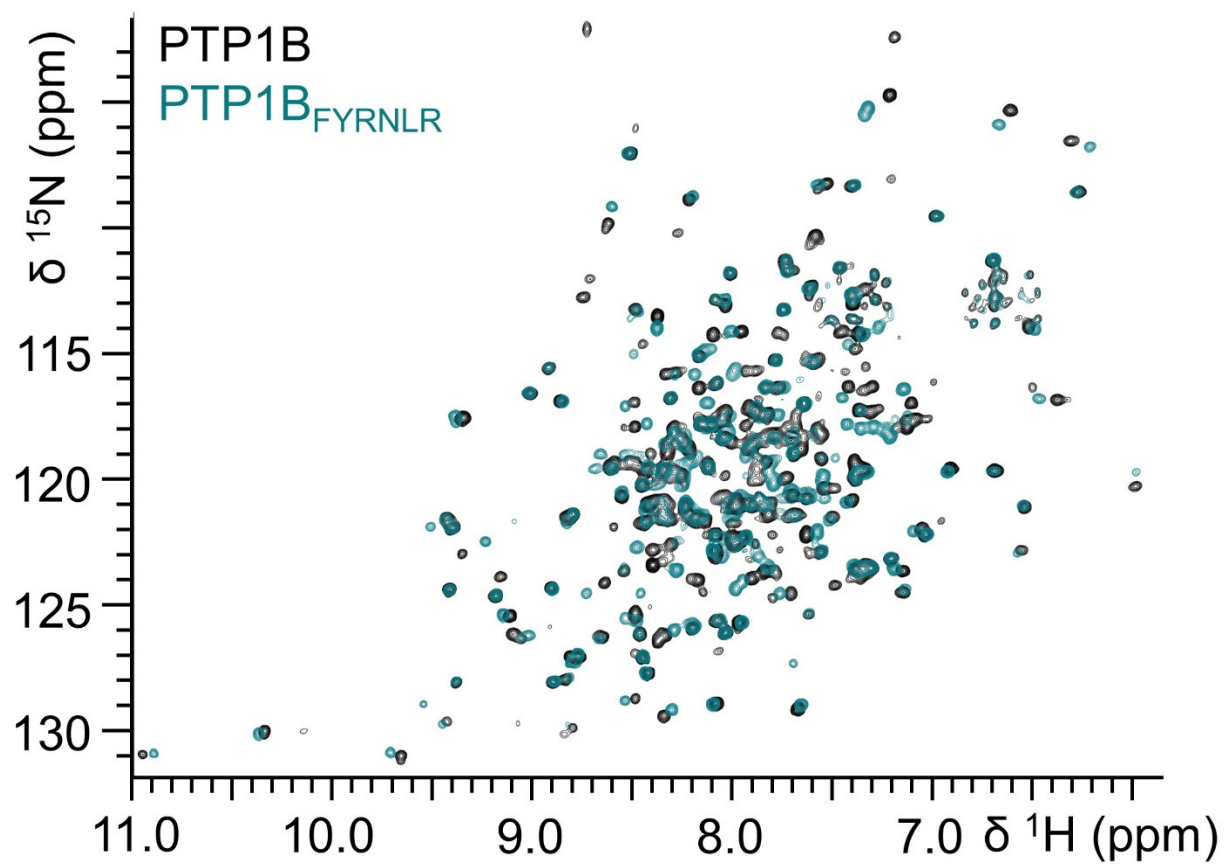

**Figure S2. PTP1B<sub>FYRNLR</sub> NMR spectroscopy data.** Overlay of the 2D [<sup>1</sup>H, <sup>15</sup>N] TROSY spectrum of PTP1B (black) and PTP1B<sub>FYRNLR</sub> (teal).

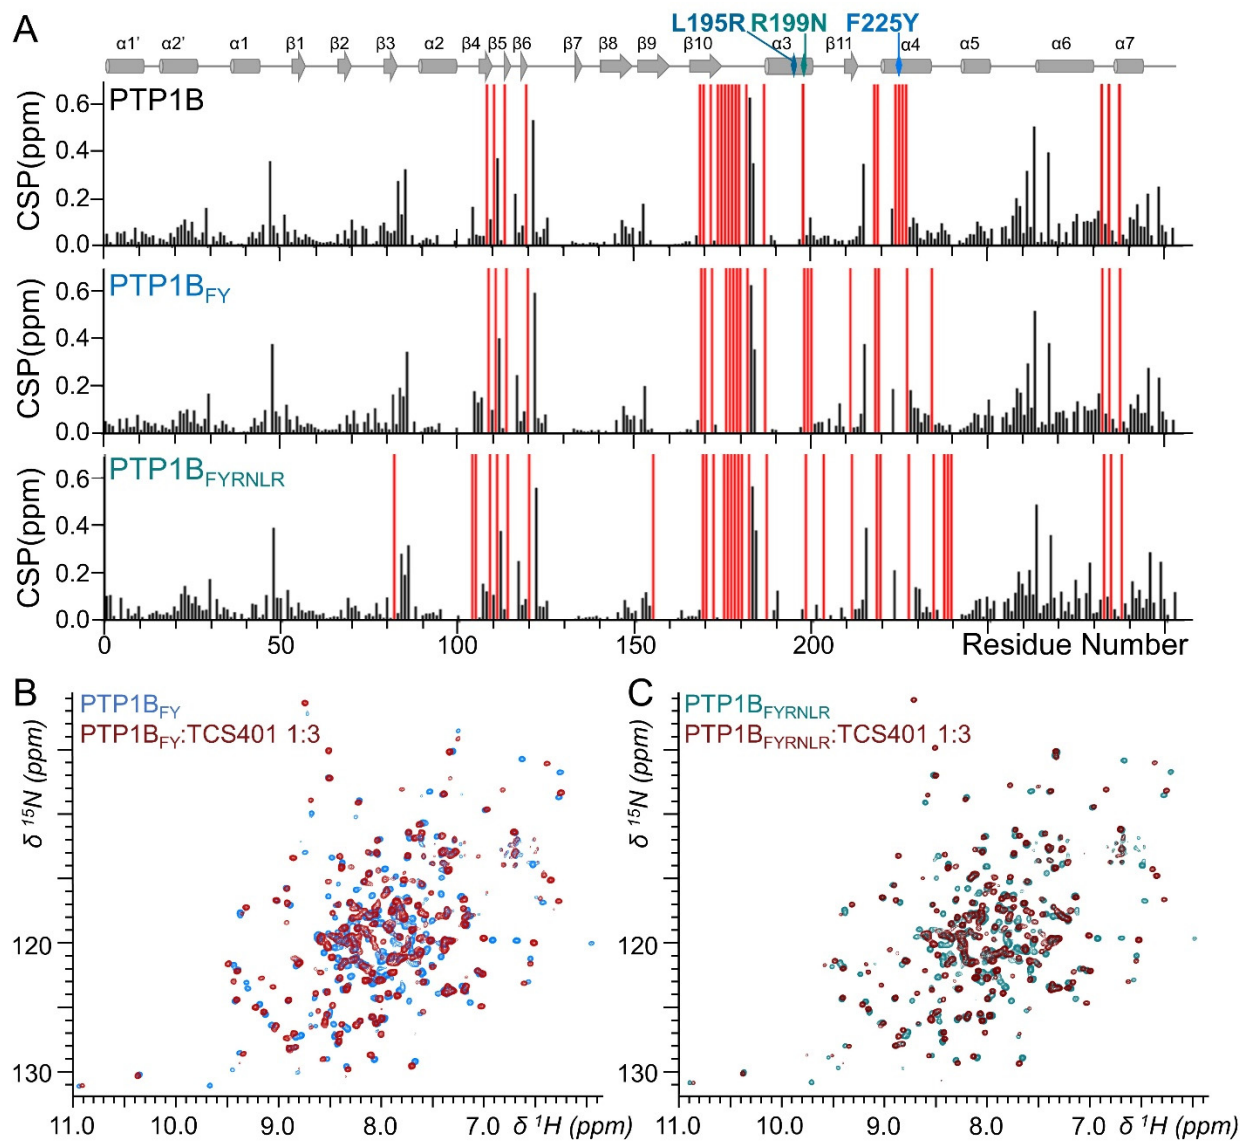

**Figure S3. CSP analysis of PTP1B<sub>FY</sub> and PTP1B<sub>FYRNLRL</sub> vs TCS401.** (A) CSP vs residue plots of PTP1B, PTP1B<sub>FY</sub> and PTP1B<sub>FYRNLRL</sub> upon saturation with TCS401. Red bars indicate peaks that broaden beyond detection. PTP1B secondary structural elements are shown above, with the position of mutations indicated by diamonds. (B) Overlay of the 2D [<sup>1</sup>H,<sup>15</sup>N] TROSY spectra of PTP1B<sub>FY</sub> (blue) and PTP1B<sub>FY</sub>:TCS401 (red; 1:3 ratio). (C) Overlay of the 2D [<sup>1</sup>H,<sup>15</sup>N] TROSY spectra of PTP1B<sub>FYRNLRL</sub> (teal) and PTP1B<sub>FYRNLRL</sub>:TCS401 (red; 1:3 ratio).



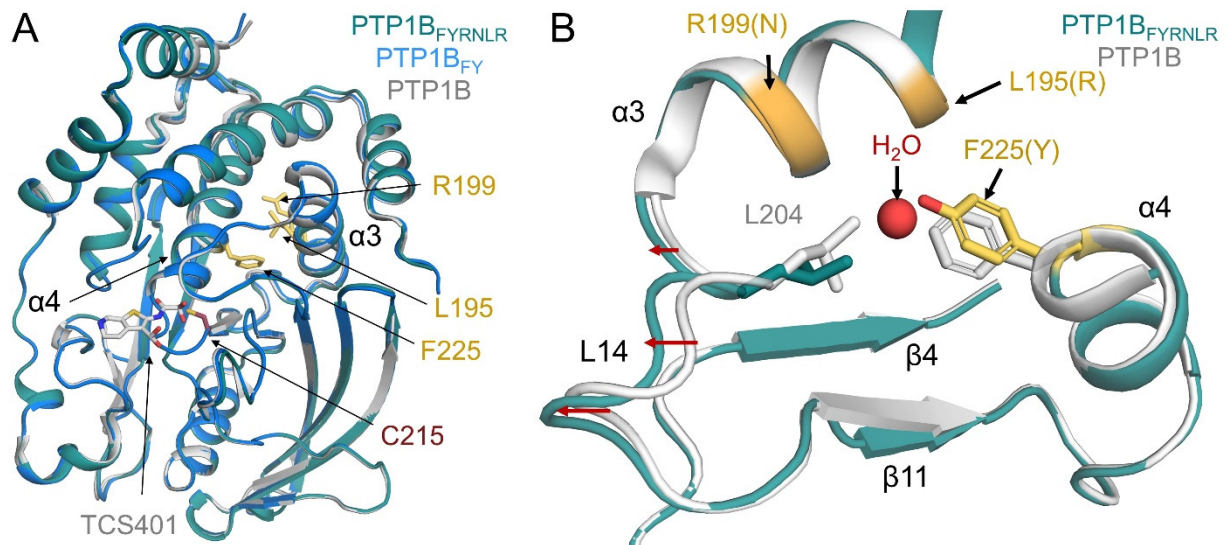

**Figure S4: Crystal structures of PTP1B<sub>FY</sub> and PTP1B<sub>FYRNL</sub>.** (A) Cartoon overlay of PTP1B (PDB 5K9VW; grey), PTP1B<sub>FY</sub> (PDB 7MKZ, blue) and PTP1B<sub>FYRNL</sub> (PDB 7MNB, teal). (B) Close-up view of structural changes around F225; key residues shown as sticks.

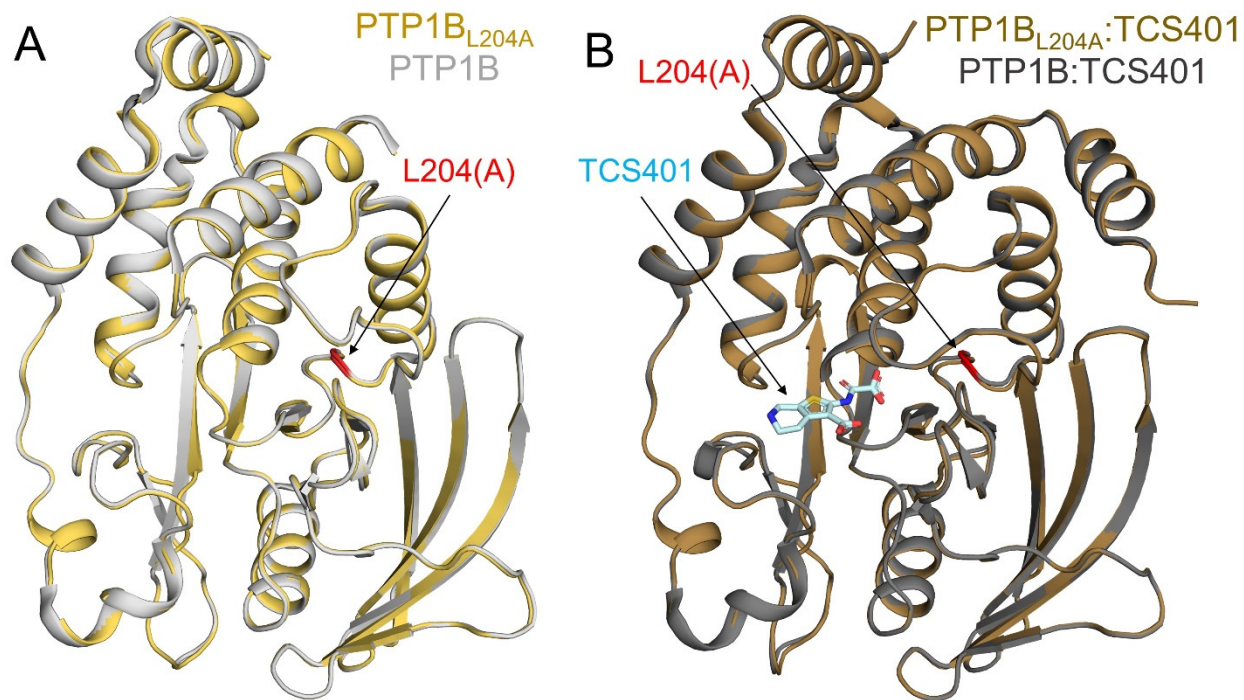

**Figure S5: Crystal structure of PTP1B<sub>L204A</sub>.** (A) Cartoon overlay of PTP1B (PDB 5K9V; grey) and PTP1B<sub>L204A</sub> (PDB 7MNC, yellow) in the ligand free state. (B) Cartoon overlay of PTP1B (PDB 5K9W; dark grey) and PTP1B<sub>L204A</sub> (PDB 7MND, dark yellow) in complex with TCS401.

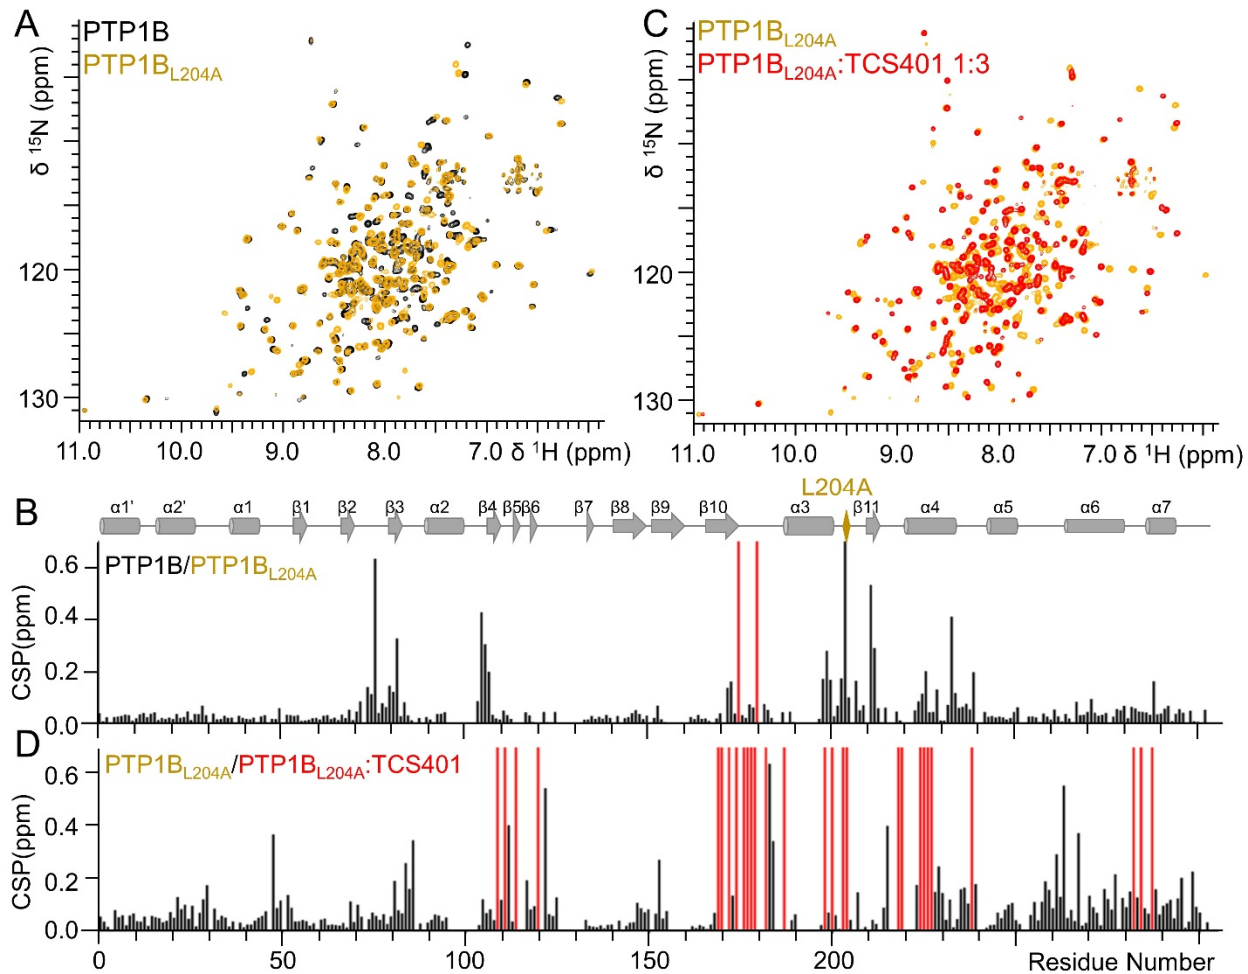

**Figure S6. Analysis of the PTP1B<sub>L204A</sub> TCS401 interaction.** (A) Overlay of the 2D [<sup>1</sup>H,<sup>15</sup>N] TROSY spectrum of PTP1B (black) and PTP1B<sub>L204A</sub> (yellow). (B) CSP vs residue plot of PTP1B and PTP1B<sub>L204A</sub>. Red bars indicate peaks that broadened beyond detection. PTP1B secondary structural elements are shown above with L204A mutation indicated by yellow diamond. (C) Overlay of the 2D [<sup>1</sup>H,<sup>15</sup>N] TROSY spectrum of PTP1B<sub>LA</sub> (yellow) with PTP1B<sub>L204A</sub>:TCS401 (red; 1:3 ratio). (D) CSP vs residue plot of PTP1B<sub>L204A</sub> upon saturation with TCS401 (1:3 ratio). Red bars indicate peaks that broadened beyond detection. PTP1B secondary structural elements are shown above with L204A mutation indicated by yellow diamond.

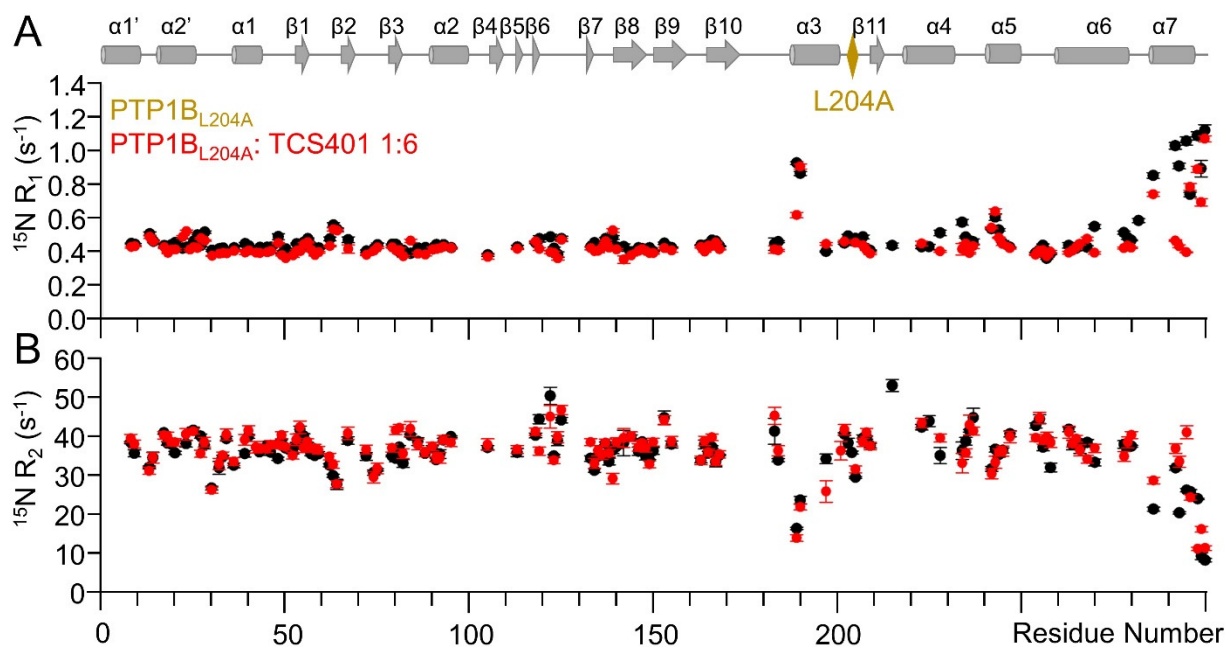

**Figure S7. PTP1B<sub>L204A</sub>  $^{15}\text{N}$  fast timescale relaxation data.** (A) 18.8 T (800 MHz  $^1\text{H}$  Larmor)  $R_1$   $^{15}\text{N}$  relaxation data for PTP1B<sub>L204A</sub> (black) and PTP1B<sub>L204A</sub>:TCS401 (1:6 ratio; red) plotted against PTP1B sequence; PTP1B secondary structural elements shown above. L204A mutation indicated by yellow diamond. (B)  $R_2$   $^{15}\text{N}$  backbone relaxation data for PTP1B<sub>L204A</sub> (black) and PTP1B<sub>L204A</sub>:TCS401 (1:6 ratio; red) plotted against PTP1B sequence.

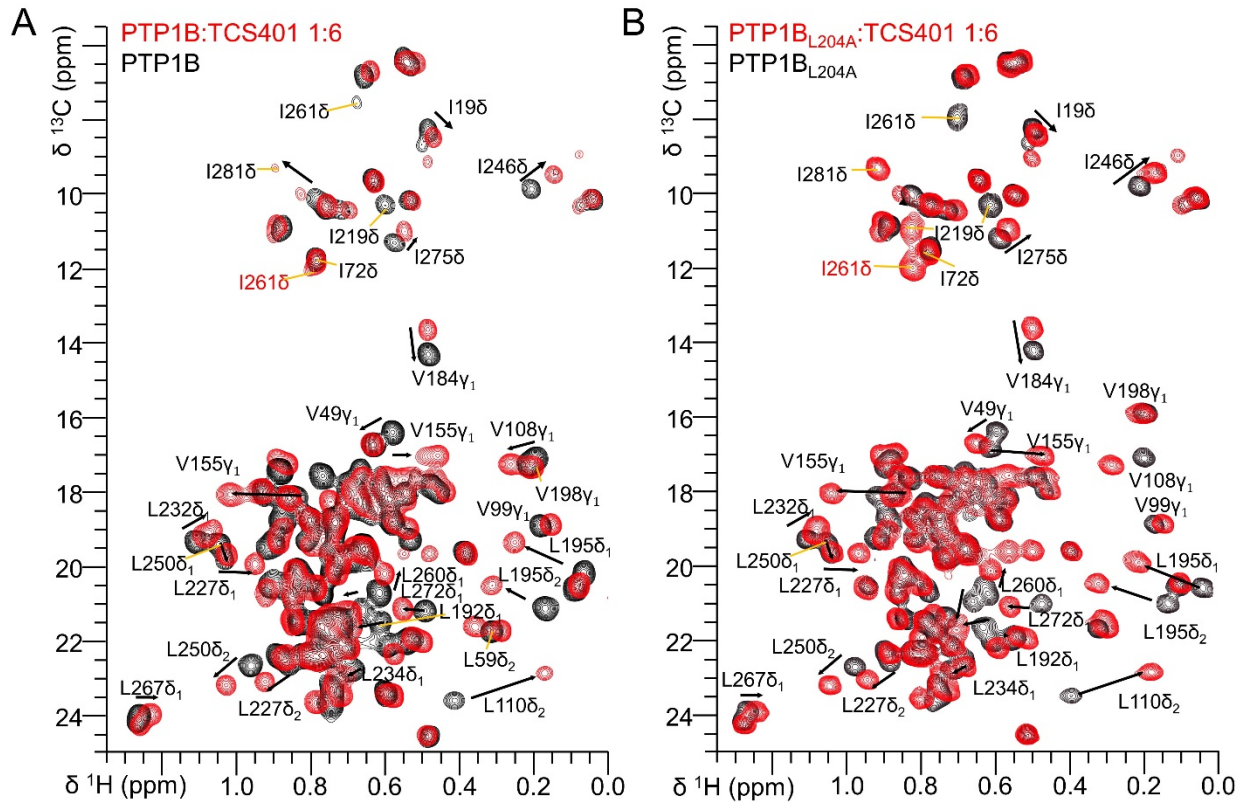

**Figure S8.  $^{13}\text{C}$  ILV 2D [ $^1\text{H}$ ,  $^{13}\text{C}$ ] HSQC spectrum of PTP1B and PTP1B<sub>L204A</sub> saturated with TCS401. (A) Overlaid  $^{13}\text{C}$  ILV 2D [ $^1\text{H}$ ,  $^{13}\text{C}$ ] HSQC spectrum of PTP1B (black) and PTP1B saturated with TCS401 (1:6 ratio, red). Moving peaks are annotated and indicated with arrows. (B) Overlaid  $^{13}\text{C}$  ILV 2D [ $^1\text{H}$ ,  $^{13}\text{C}$ ] HSQC spectrum of PTP1<sub>L204A</sub> (black) and PTP1B<sub>L204A</sub> saturated with TCS401 (1:6 ratio, red). Moving peaks are annotated and indicated with arrows.**

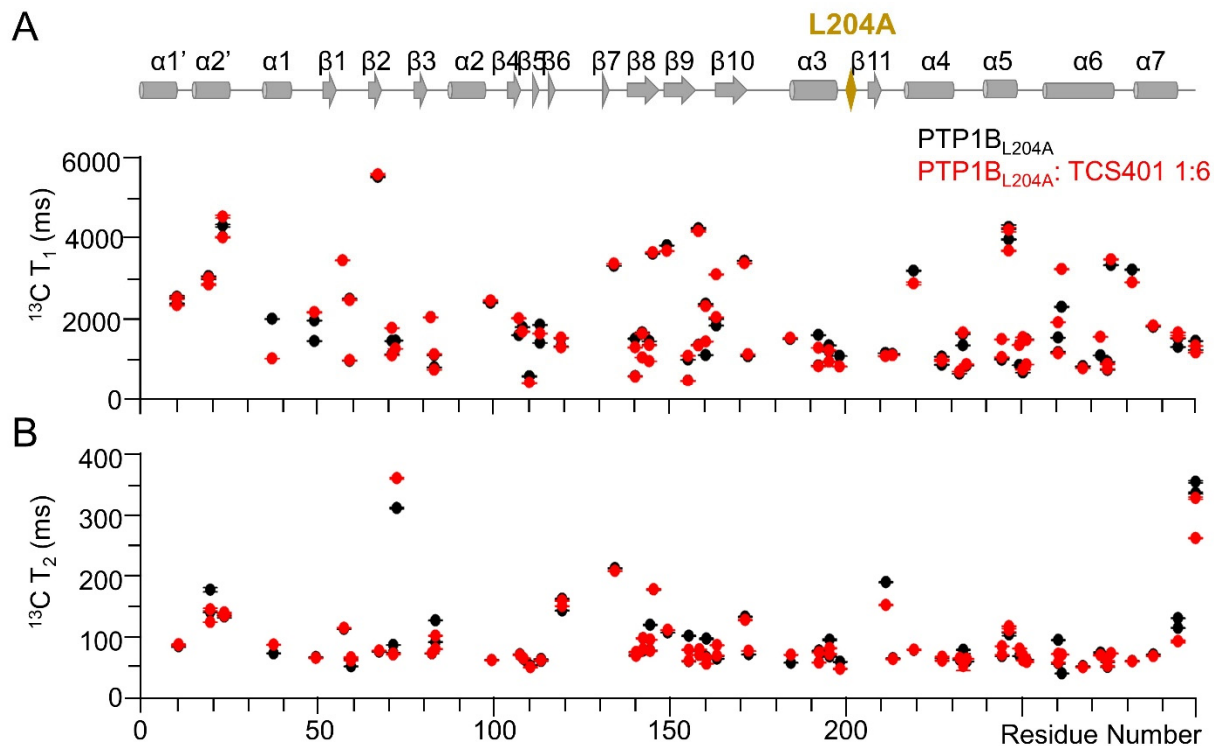

**Figure S9. PTP1B<sub>L204A</sub>  $^{13}\text{C}$  ILV fast timescale relaxation data.** (A) 18.8 T  $T_1$   $^{13}\text{C}$  ILV relaxation data PTP1B<sub>L204A</sub> (black) and PTP1B<sub>L204A</sub>:TCS401 (1:6 ratio; red) plotted against PTP1B sequence; PTP1B secondary structural elements shown above. L204A mutation indicated by yellow diamond. (B)  $T_2$   $^{13}\text{C}$  ILV relaxation data for PTP1B<sub>L204A</sub> (black) and PTP1B<sub>L204A</sub>:TCS401 (1:6 ratio; red) plotted against PTP1B sequence.

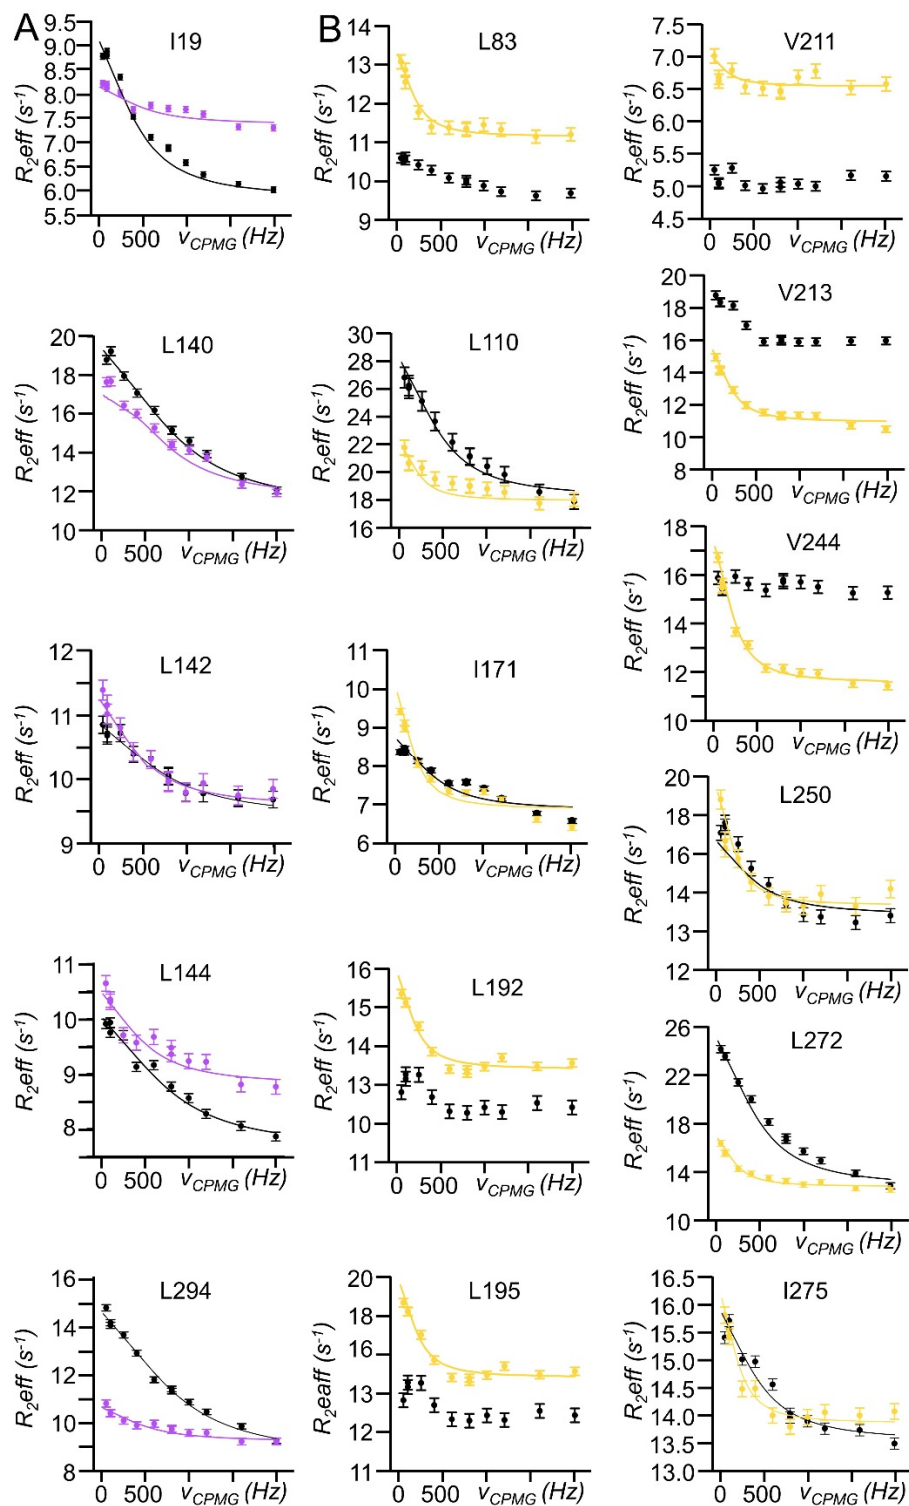

**Figure S10. Intermediate timescale  $^{13}\text{C}$  ILV relaxation dispersion dynamics of PTP1B<sub>L204A</sub> upon TCS401 binding.** (A) Examples of group 1 residues in PTP1B<sub>L204A</sub> (black) and PTP1B<sub>L204A</sub>:TCS401 saturated (purple). (B) Examples of group 2 residues for PTP1B<sub>L204A</sub> (black) and PTP1B<sub>L204A</sub>:TCS401 saturated (yellow).

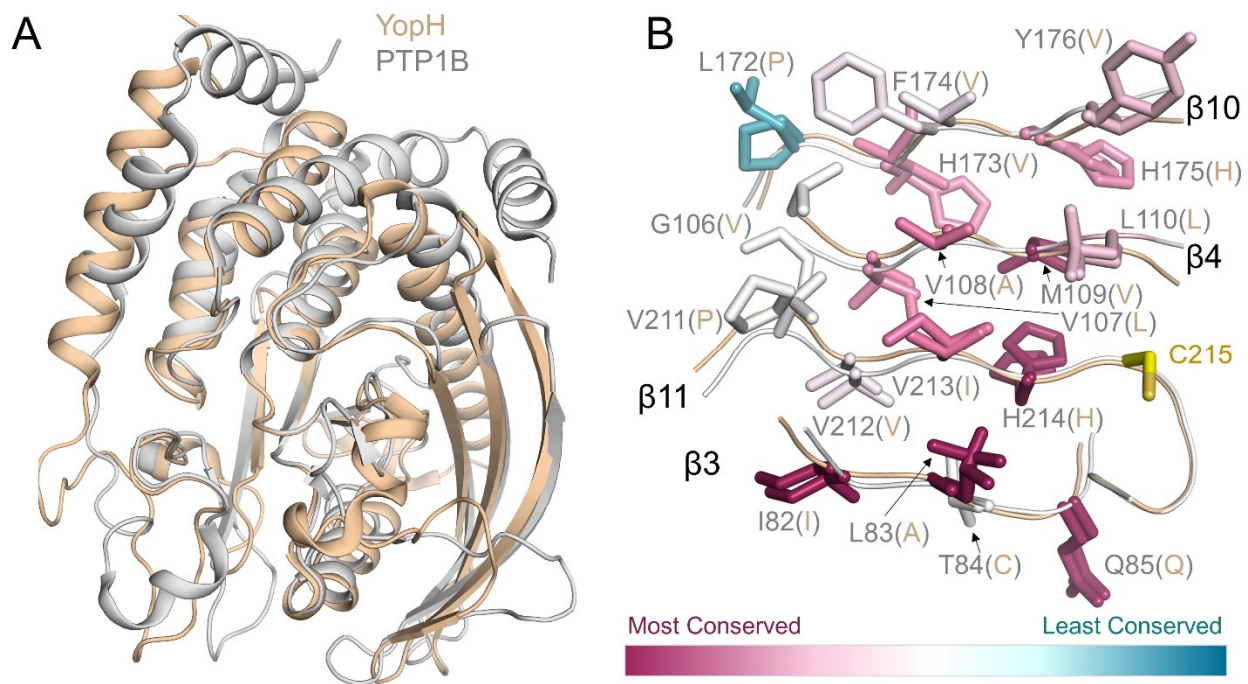

**Figure S11. PTP1B and YopH.** (A) Overlay of PTP1B (PDB 5K9W, gray) with YopH (PDB 1LYV, wheat). (B) Overlay of the  $\beta$ -strands  $\beta$ 3/ $\beta$ 4/ $\beta$ 10/ $\beta$ 11 with conserved residues shown as sticks.
